# Supplementary material for: Tunable band alignment and large power conversion efficiency in a two-dimensional InS/ZnIn2S4 heterostructure
Source: PubMed Central journal article supplement — RSC Adv. 2024 Dec 23;14(54):40077–85. doi: 10.1039/d4ra06901c (PMC11664243; doi:10.1039/d4ra06901c), 2024-12-23
Supplement: RA-014-D4RA06901C-s001.pdf [file RA-014-D4RA06901C-s001.pdf]

## Supplementary Information

# Tunable band alignment and large power conversion efficiency in two dimensional InS/ZnIn<sub>2</sub>S<sub>4</sub> van der Waals heterostructure

Hui-Ying Liu<sup>1</sup>, Heng-Fu Lin<sup>1,2†</sup>, Lu-Ya Xu<sup>1</sup>, Ting-Ping Hou<sup>1,2</sup>, and Nan-Shu Liu<sup>3†</sup>

<sup>1</sup>Hubei Province Key Laboratory of Systems Science in Metallurgical Process, and College of Science, Wuhan University of Science and Technology, Wuhan 430081, China

<sup>2</sup>The State Key Laboratory for Refractory Material and Metallurgy, International Research Institute for Steel Technology, and Collaborative Center on Advanced Steels, Wuhan University of Science and Technology, Wuhan 430081, China

<sup>3</sup>Chongqing Key Laboratory of Micro & Nano Structure Optoelectronics, School of Physical Science and Technology, Southwest University, Chongqing 400715, China

---

† Corresponding author. Email: [hflin@wust.edu.cn](mailto:hflin@wust.edu.cn) (H. F. Lin), [liuns0215@gmail.com](mailto:liuns0215@gmail.com) (N. S. Liu),.

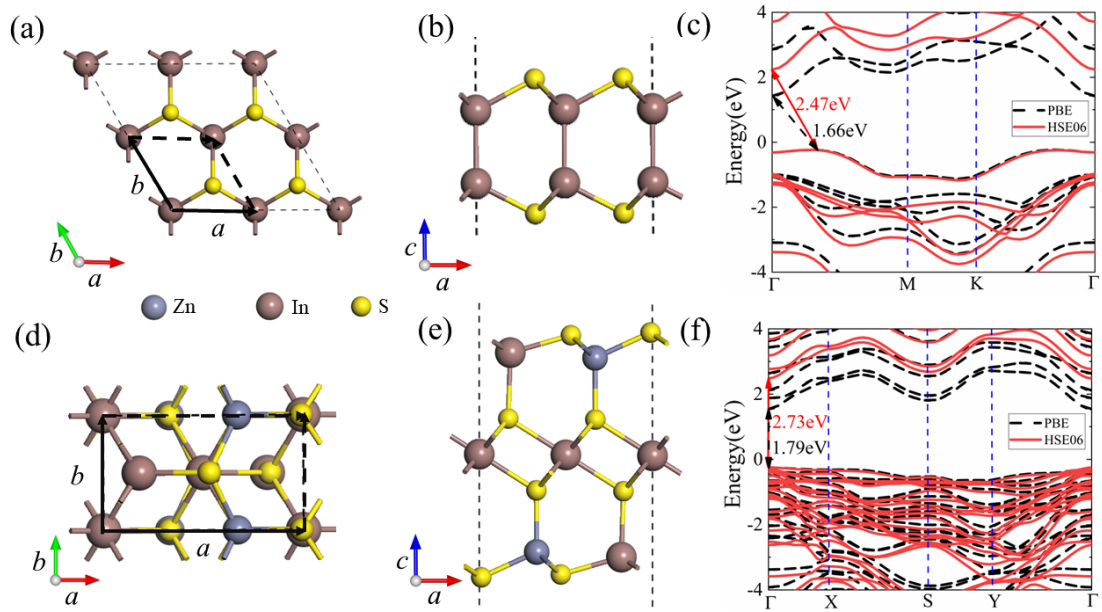

**Fig. S1.** Top and side views of InS monolayer [(a) and (b)] and  $\text{ZnIn}_2\text{S}_4$  monolayer [(d) and (e)]. The black line in (a) and (d) indicates the unit cell. The band structures of InS monolayer (c) and  $\text{ZnIn}_2\text{S}_4$  monolayer (f).

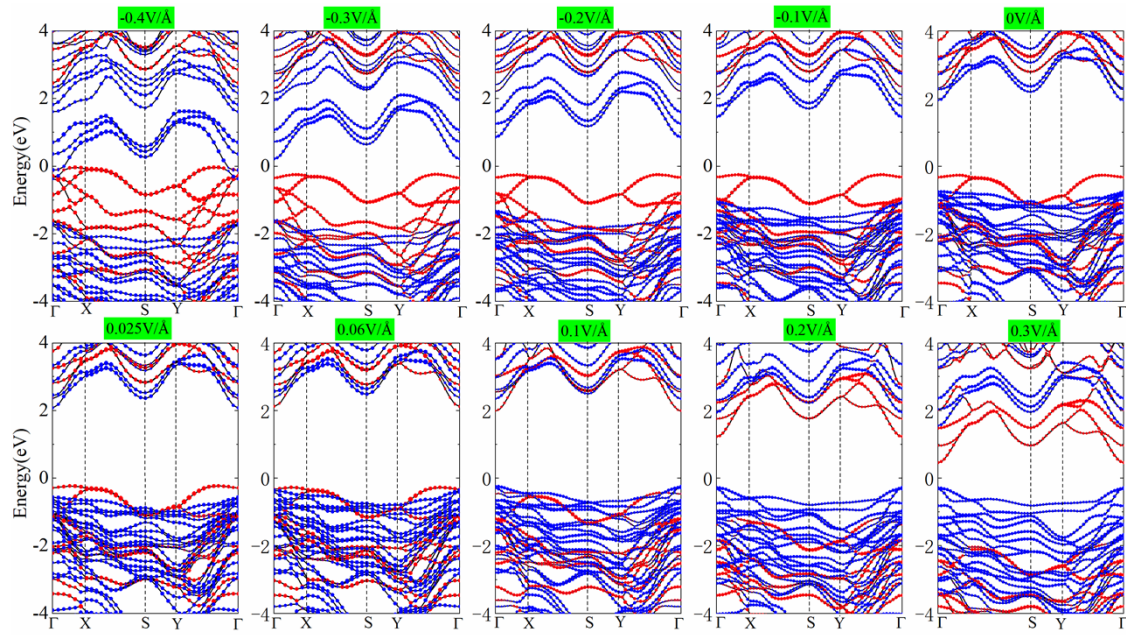

**Fig. S2.** The projected band structures of the InS/ZnIn<sub>2</sub>S<sub>4</sub> heterostructure under electric field ranging from  $-0.4$  to  $0.3$  V/Å.

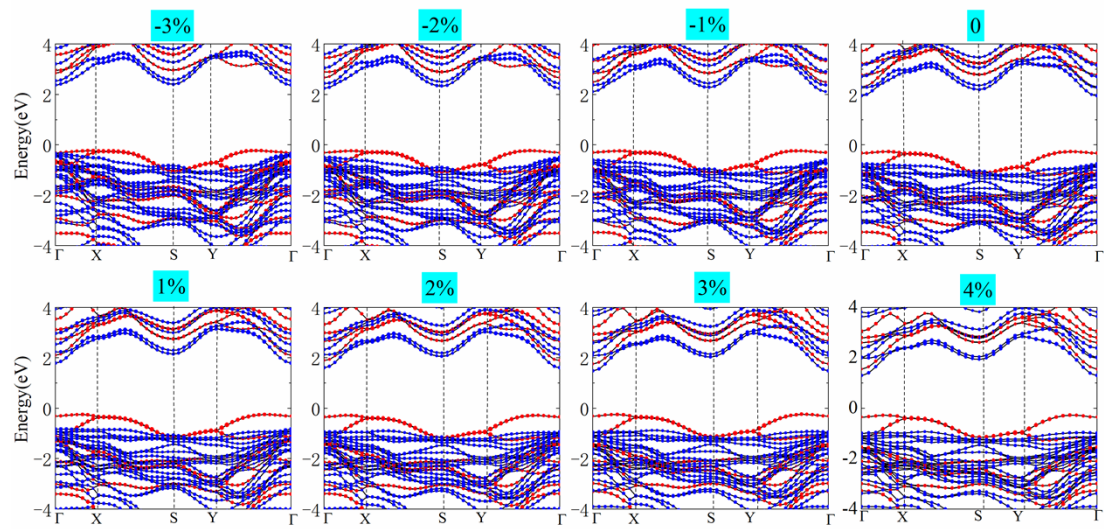

**Fig. S3.** The projected band structures of InS/ZnIn<sub>2</sub>S<sub>4</sub> heterostructure with different biaxial strains. The Fermi levels are set to zero.

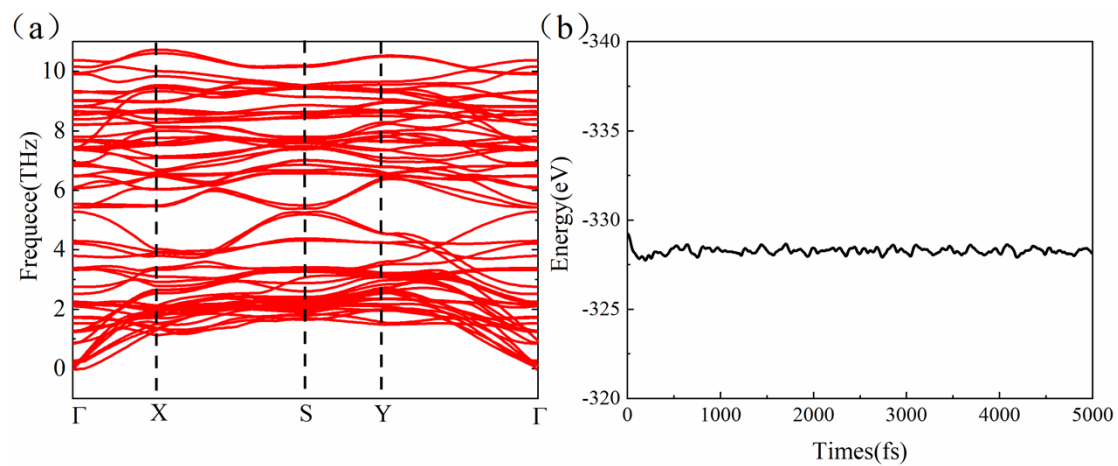

**Fig. S4.** Phonon spectrums of InS/ZnIn<sub>2</sub>S<sub>4</sub> heterostructure (a), the variation of total energy of Ga<sub>2</sub>SeTe/In<sub>2</sub>SSe (HS1-AB) vdW heterostructures as a function of time at temperature 300 K(b).

**Table S1.** The calculated lattice constants ( $a$  and  $b$ ), equilibrium interlayer distance ( $d$ ), and binding energy ( $E_b$ ) of the InS/ZnIn<sub>2</sub>S<sub>4</sub> heterostructures with different stacking configuration.

|    | $a(\text{\AA})$ | $b(\text{\AA})$ | $d(\text{\AA})$ | $E_b(\text{meV})$ |
|----|-----------------|-----------------|-----------------|-------------------|
| AA | 6.796           | 3.929           | 3.71            | -25.1             |
| AB | 6.796           | 3.928           | 3.77            | -14.9             |
| AC | 6.795           | 3.926           | 4.19            | -9.6              |
| AD | 6.795           | 3.928           | 4.03            | -11.7             |

**Table S2.** The calculated  $\eta$  of the InS/ZnIn<sub>2</sub>S<sub>4</sub> heterostructure under different electric field  $E_{\perp}$ . The relevant parameters for the  $\eta$ ,  $E_g^d$ ,  $J_{sc}/P_{solar}$ ,  $\Delta E_c$ , and  $V_{oc}$ , are also provided.

| $E_{\perp}$ | $E_g^d$ | $J_{sc}/P_{solar}$ | $\Delta E_c$ [eV] | $V_{oc}$ [V] | $\eta(\%)$ |
|-------------|---------|--------------------|-------------------|--------------|------------|
| -0.3        | 2.63    | 0.078              | 2.17              | 0.16         | 0.81       |
| -0.2        | 3.02    | 0.032              | 1.91              | 0.81         | 1.68       |
| -0.1        | 2.61    | 0.081              | 0.90              | 1.41         | 7.42       |
| 0           | 2.57    | 0.087              | 0.36              | 1.91         | 10.80      |
| 0.025       | 2.59    | 0.085              | 0.28              | 2.01         | 11.10      |
| 0.1         | 2.60    | 0.082              | 0.37              | 1.93         | 10.29      |
| 0.2         | 2.24    | 0.155              | 0.73              | 1.21         | 12.19      |
| 0.3         | 1.84    | 0.245              | 1.09              | 0.45         | 7.17       |

**Table S3.** The calculated  $\eta$  of the InS/ZnIn<sub>2</sub>S<sub>4</sub> heterostructure under different biaxial strains  $\varepsilon$ . The relevant parameters for the  $\eta$ ,  $E_g^d$ ,  $J_{sc}/P_{solar}$ ,  $\Delta E_c$ , and  $V_{oc}$ , are also provided.

| $\varepsilon(\%)$ | $E_g^d$ [eV] | $J_{sc}/P_{solar}$ | $\Delta E_c$ [eV] | $V_{oc}$ [V] | $\eta(\%)$ |
|-------------------|--------------|--------------------|-------------------|--------------|------------|
| -3                | 3.07         | 0.028              | 0.47              | 2.30         | 4.18       |
| -2                | 2.90         | 0.042              | 0.43              | 2.17         | 5.92       |
| -1                | 2.73         | 0.065              | 0.38              | 2.05         | 8.66       |
| 0                 | 2.57         | 0.087              | 0.36              | 1.91         | 10.80      |
| 1                 | 2.35         | 0.127              | 0.32              | 1.73         | 14.28      |
| 2                 | 2.18         | 0.163              | 0.30              | 1.58         | 16.74      |
| 3                 | 2.00         | 0.205              | 0.28              | 1.42         | 18.92      |
| 4                 | 1.83         | 0.252              | 0.26              | 1.27         | 20.80      |

**Table S4.** Calculated carrier effective mass ( $m^*$ ), deformation potential constant ( $E_l$ ), and carrier mobility ( $\mu$ ) for electron ( $e$ ) and hole ( $h$ ) along the zigzag ( $x$ ) and armchair ( $y$ ) directions at 300 K in InS/ZnIn<sub>2</sub>S<sub>4</sub> heterostructure

| Carrier type | $m_x^*(m_0)$ | $m_y^*(m_0)$ | $E_{lx}(eV)$ | $E_{ly}(eV)$ | $\mu_x$<br>(cm <sup>2</sup> V <sup>-1</sup> s <sup>-1</sup> ) | $\mu_y$<br>(cm <sup>2</sup> V <sup>-1</sup> s <sup>-1</sup> ) |
|--------------|--------------|--------------|--------------|--------------|---------------------------------------------------------------|---------------------------------------------------------------|
| Electron     | 1.49         | 1.28         | -8.35        | -8.72        | 2091.06                                                       | 2231.94                                                       |
| Hole         | 0.9          | 1.01         | -9.28        | -7.00        | 3481.04                                                       | 6118.01                                                       |
